# Supplementary material for: Influence maximization in time bounded network identifies transcription factors regulating perturbed pathways
Source: PubMed Central journal article supplement — Bioinformatics. 2016 Jun 11;32(12):i128–36. doi: 10.1093/bioinformatics/btw275 (PMC4908359; doi:10.1093/bioinformatics/btw275), 2016-06-11
Supplement: supp_btw275_Kim.89.sup.fig.1.pdf [file supp_btw275_Kim.89.sup.fig.1.pdf]

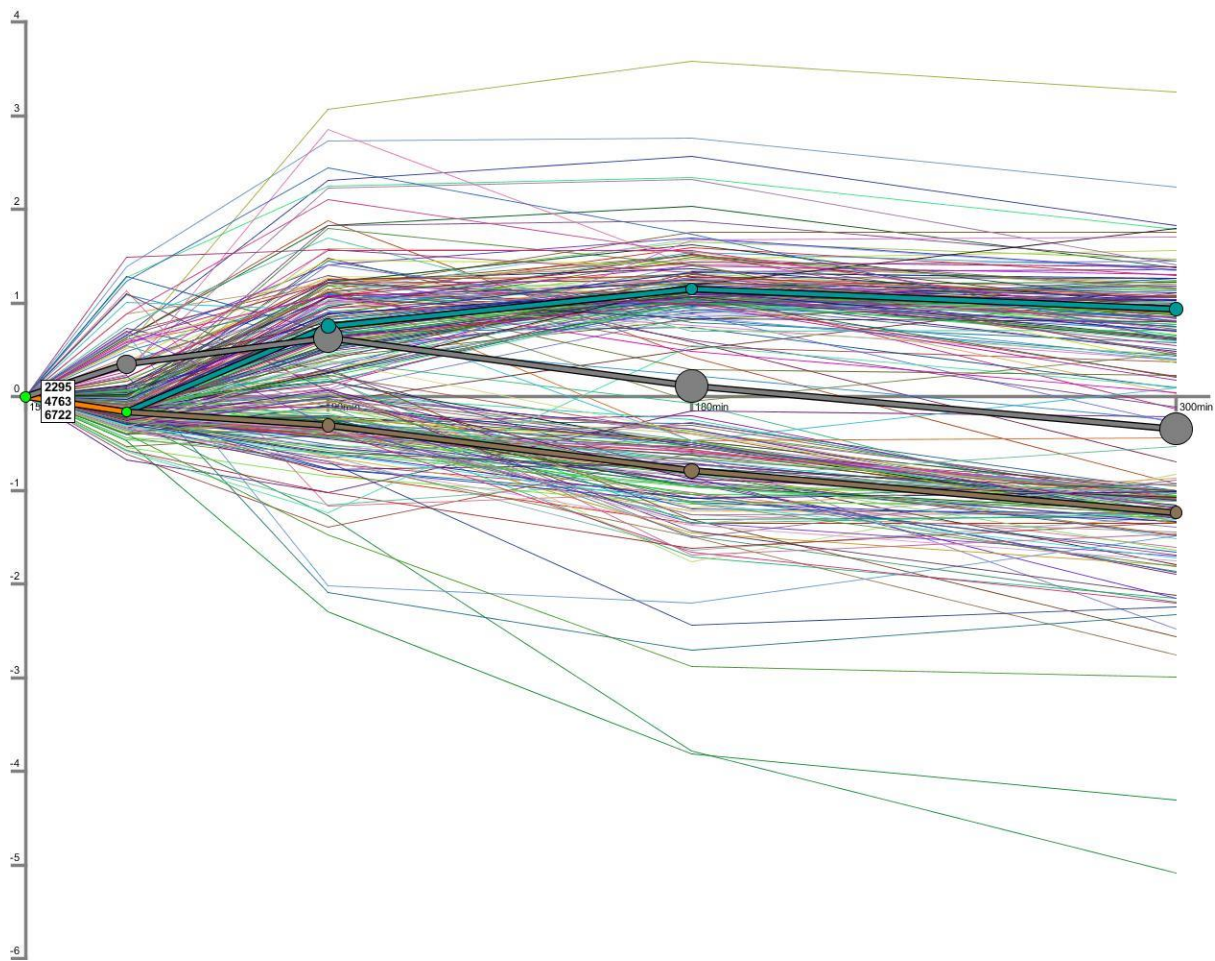

**Supplementary Figure 1.** DREM result. DREM found three clusters (green, gray and brown lines from the top). Three TFs are predicted to target a cluster colored in gray. Gene symbols (entrez IDs) of the TFs are FOXF2 (2295), NF1 (4763), SRF (6722).

| Pathway  | Pathway name                                           | DEAP  | TimeClip | SPIA  | TRAP  |       |
|----------|--------------------------------------------------------|-------|----------|-------|-------|-------|
|          |                                                        |       |          |       | pORA  | pPERT |
| hsa00140 | Steroid hormone biosynthesis                           | -     | 0.005    | -     | -     | -     |
| hsa00330 | Arginine and proline metabolism                        | -     | 0.032    | -     | -     | -     |
| hsa00450 | Selenocompound metabolism                              | -     | 0.016    | -     | -     | -     |
| hsa00830 | Retinol metabolism                                     | -     | 0.044    | -     | -     | -     |
| hsa04010 | MAPK signaling pathway                                 | -     | -        | -     | 0.000 | 0.035 |
| hsa04014 | Ras signaling pathway                                  | -     | 0.047    | -     | -     | -     |
| hsa04015 | Rap1 signaling pathway                                 | -     | 0.006    | -     | 0.000 | 0.043 |
| hsa04022 | cGMP-PKG signaling pathway                             | -     | -        | -     | 0.000 | 0.000 |
| hsa04060 | Cytokine-cytokine receptor interaction                 | -     | -        | -     | 0.000 | 0.000 |
| hsa04062 | Chemokine signaling pathway                            | -     | -        | -     | 0.000 | 0.046 |
| hsa04080 | Neuroactive ligand-receptor interaction                | -     | 0.028    | -     | 0.000 | 0.005 |
| hsa04110 | Cell cycle                                             | -     | 0.032    | -     | -     | -     |
| hsa04115 | p53 signaling pathway                                  | -     | 0.036    | -     | -     | -     |
| hsa04270 | Vascular smooth muscle contraction                     | -     | -        | -     | 0.000 | 0.001 |
| hsa04340 | Hedgehog signaling pathway                             | -     | 0.039    | -     | -     | -     |
| hsa04350 | TGF-beta signaling pathway                             | -     | -        | 0.002 | -     | -     |
| hsa04370 | VEGF signaling pathway                                 | -     | 0.010    | -     | -     | -     |
| hsa04512 | ECM-receptor interaction                               | -     | 0.030    | 0.002 | 0.000 | 0.001 |
| hsa04540 | Gap junction                                           | -     | -        | -     | 0.006 | 0.013 |
| hsa04611 | Platelet activation                                    | -     | -        | -     | 0.000 | 0.003 |
| hsa04622 | RIG-I-like receptor signaling pathway                  | -     | 0.015    | -     | -     | -     |
| hsa04630 | Jak-STAT signaling pathway                             | -     | 0.021    | 0.002 | -     | -     |
| hsa04668 | TNF signaling pathway                                  | -     | -        | -     | 0.030 | 0.000 |
| hsa04720 | Long-term potentiation                                 | -     | -        | -     | 0.000 | 0.028 |
| hsa04721 | Synaptic vesicle cycle                                 | 0.000 | -        | -     | -     | -     |
| hsa04723 | Retrograde endocannabinoid signaling                   | -     | -        | -     | 0.000 | 0.000 |
| hsa04724 | Glutamatergic synapse                                  | -     | -        | -     | 0.000 | 0.047 |
| hsa04730 | Long-term depression                                   | -     | -        | -     | 0.001 | 0.002 |
| hsa04740 | Olfactory transduction                                 | -     | -        | -     | 0.000 | 0.000 |
| hsa04744 | Phototransduction                                      | -     | -        | -     | 0.000 | 0.048 |
| hsa04912 | GnRH signaling pathway                                 | -     | -        | -     | 0.000 | 0.035 |
| hsa04960 | Aldosterone-regulated sodium reabsorption              | -     | 0.048    | -     | -     | -     |
| hsa04970 | Salivary secretion                                     | -     | -        | -     | 0.000 | 0.001 |
| hsa04971 | Gastric acid secretion                                 | -     | 0.019    | -     | 0.000 | 0.000 |
| hsa05010 | Alzheimer's disease                                    | -     | -        | -     | 0.000 | 0.002 |
| hsa05133 | Pertussis                                              | -     | -        | -     | 0.000 | 0.010 |
| hsa05134 | Legionellosis                                          | -     | -        | -     | 0.000 | 0.001 |
| hsa05140 | Leishmaniasis                                          | -     | -        | -     | 0.000 | 0.000 |
| hsa05143 | African trypanosomiasis                                | -     | -        | -     | 0.000 | 0.034 |
| hsa05144 | Malaria                                                | -     | -        | -     | 0.000 | 0.000 |
| hsa05146 | Amoebiasis                                             | -     | -        | -     | 0.000 | 0.001 |
| hsa05215 | Prostate cancer                                        | -     | -        | -     | 0.000 | 0.029 |
| hsa05222 | Small cell lung cancer                                 | -     | 0.046    | 0.002 | -     | -     |
| hsa05321 | Inflammatory bowel disease (IBD)                       | -     | -        | -     | 0.000 | 0.019 |
| hsa05323 | Rheumatoid arthritis                                   | -     | -        | -     | 0.000 | 0.006 |
| hsa05412 | Arrhythmogenic right ventricular cardiomyopathy (ARVC) | -     | 0.047    | -     | -     | -     |

**Supplementary Table 1.** Pathways detected by other representative tools and not detected by TimeTP. Pathways with p-value over 0.05 are denoted as '-'.

| Cluster | # of genes | Pathway                                                | P-value  | TF              |
|---------|------------|--------------------------------------------------------|----------|-----------------|
| Gray    | 71         | NA                                                     | NA       | FOXF2, NF1, SRF |
| Green   | 132        | Focal adhesion                                         | 4.30E-04 |                 |
|         |            | Arrhythmogenic right ventricular cardiomyopathy (ARVC) | 5.10E-03 |                 |
|         |            | Regulation of actin cytoskeleton                       | 1.30E-02 |                 |
|         |            | Leukocyte transendothelial migration                   | 2.30E-02 |                 |
|         |            | Pathways in cancer                                     | 2.90E-02 |                 |
|         |            | Small cell lung cancer                                 | 4.20E-02 |                 |
|         |            | ECM-receptor interaction                               | 4.20E-02 |                 |
|         |            | Hypertrophic cardiomyopathy (HCM)                      | 4.30E-02 |                 |
|         |            | Hematopoietic cell lineage                             | 4.40E-02 |                 |
| Brown   | 197        | Phosphatidylinositol signaling system                  | 2.60E-02 |                 |
|         |            | Taste transduction                                     | 7.40E-02 |                 |
|         |            | Inositol phosphate metabolism                          | 7.90E-02 |                 |

**Supplementary Table 2.** Clustering result of DREM. Pathway analysis (Fisher's exact test) is performed by DAVID (Huang *et al.*, 2008).

## Reference

Huang, D. W., Sherman, B. T., & Lempicki, R. A. (2008). Systematic and integrative analysis of large gene lists using DAVID bioinformatics resources. *Nature protocols*, 4(1), 44-57.

| <b>Tool</b> | <b>TimeTP</b>        | <b>DEAP</b> | <b>timeClip</b> | <b>SPIA</b> | <b>TRAP</b> |
|-------------|----------------------|-------------|-----------------|-------------|-------------|
| Time (s)    | 906.767<br>(408.862) | 1776.885    | 94.989          | 398.474     | 1125.961    |

**Supplementary Table 3.** Running time of TimeTP and other pathway analysis tools using MCF10a dataset with 6 time points (Kiselev et al., 2015). Different from other tools, TimeTP include an additional process for regulator analysis in addition to pathway analysis. The number in brackets is the running time measured for pathway analysis only. (Intel(R) Xeon(R) CPU E7-4850 2.00GHz, CentOS 5.8. Python 2.7.3. for TimeTP, DEAP and TRAP. R 3.2.2 for timeClip and SPIA.)

| Tool            | pathwayID | pathwayName                             | Avg. BEST Score of PI3K |
|-----------------|-----------|-----------------------------------------|-------------------------|
| <b>TimeTP</b>   | hsa04012  | ErbB signaling pathway                  | 34.417                  |
|                 | hsa04068  | FoxO signaling pathway                  | 39.465                  |
|                 | hsa04114  | Oocyte meiosis                          | 17.719                  |
|                 | hsa04151  | PI3K-Akt signaling pathway              | 5888.045                |
|                 | hsa04310  | Wnt signaling pathway                   | 203.205                 |
|                 | hsa04510  | Focal adhesion                          | 455.123                 |
|                 | hsa04520  | Adherens junction                       | 81.145                  |
|                 | hsa04666  | Fc gamma R-mediated phagocytosis        | 0.000                   |
|                 | hsa04810  | Regulation of actin cytoskeleton        | 21.974                  |
|                 | hsa04921  | Oxytocin signaling pathway              | 0.000                   |
| <b>DEAP</b>     | hsa04721  | Synaptic vesicle cycle                  | 0.000                   |
| <b>SPIA</b>     | hsa04350  | TGF-beta signaling pathway              | 7.100                   |
|                 | hsa04510  | Focal adhesion                          | 455.123                 |
|                 | hsa04512  | ECM-receptor interaction                | 14.104                  |
|                 | hsa04630  | Jak-STAT signaling pathway              | 135.708                 |
|                 | hsa05222  | Small cell lung cancer                  | 725.022                 |
| <b>TRAP</b>     | hsa04010  | MAPK signaling pathway                  | 550.741                 |
|                 | hsa04015  | Rap1 signaling pathway                  | 4.825                   |
|                 | hsa04022  | cGMP-PKG signaling pathway              | 8.847                   |
|                 | hsa04060  | Cytokine-cytokine receptor interaction  | 12.712                  |
|                 | hsa04062  | Chemokine signaling pathway             | 11.871                  |
|                 | hsa04080  | Neuroactive ligand-receptor interaction | 3.869                   |
|                 | hsa04151  | PI3K-Akt signaling pathway              | 5888.045                |
|                 | hsa04270  | Vascular smooth muscle contraction      | 2.536                   |
|                 | hsa04510  | Focal adhesion                          | 455.123                 |
|                 | hsa04512  | ECM-receptor interaction                | 14.104                  |
|                 | hsa04540  | Gap junction                            | 69.789                  |
|                 | hsa04611  | Platelet activation                     | 143.910                 |
|                 | hsa04668  | TNF signaling pathway                   | 1.459                   |
|                 | hsa04720  | Long-term potentiation                  | 74.123                  |
|                 | hsa04723  | Retrograde endocannabinoid signaling    | 0.000                   |
|                 | hsa04724  | Glutamatergic synapse                   | 5.982                   |
|                 | hsa04730  | Long-term depression                    | 25.106                  |
|                 | hsa04740  | Olfactory transduction                  | 3.396                   |
|                 | hsa04744  | Phototransduction                       | 2.279                   |
|                 | hsa04912  | GnRH signaling pathway                  | 2.167                   |
|                 | hsa04921  | Oxytocin signaling pathway              | 0.000                   |
|                 | hsa04970  | Salivary secretion                      | 0.190                   |
|                 | hsa04971  | Gastric acid secretion                  | 2.988                   |
|                 | hsa05010  | Alzheimer's disease                     | 287.818                 |
|                 | hsa05133  | Pertussis                               | 115.092                 |
|                 | hsa05134  | Legionellosis                           | 0.000                   |
|                 | hsa05140  | Leishmaniasis                           | 17.211                  |
|                 | hsa05143  | African trypanosomiasis                 | 0.000                   |
|                 | hsa05144  | Malaria                                 | 20.215                  |
|                 | hsa05146  | Amoebiasis                              | 0.577                   |
|                 | hsa05215  | Prostate cancer                         | 967.044                 |
|                 | hsa05321  | Inflammatory bowel disease (IBD)        | 93.237                  |
|                 | hsa05323  | Rheumatoid arthritis                    | 183.177                 |
| <b>TimeClip</b> | hsa00140  | Steroid hormone biosynthesis            | 3.001                   |
|                 | hsa00330  | Arginine and proline metabolism         | 0.000                   |
|                 | hsa00450  | Selenocompound metabolism               | 0.000                   |
|                 | hsa00830  | Retinol metabolism                      | 0.000                   |
|                 | hsa04014  | Ras signaling pathway                   | 121.478                 |
|                 | hsa04015  | Rap1 signaling pathway                  | 4.825                   |
|                 | hsa04080  | Neuroactive ligand-receptor interaction | 3.869                   |

|          |                                                        |          |
|----------|--------------------------------------------------------|----------|
| hsa04110 | Cell cycle                                             | 1795.028 |
| hsa04115 | p53 signaling pathway                                  | 54.785   |
| hsa04151 | PI3K-Akt signaling pathway                             | 5888.045 |
| hsa04310 | Wnt signaling pathway                                  | 203.205  |
| hsa04340 | Hedgehog signaling pathway                             | 51.371   |
| hsa04370 | VEGF signaling pathway                                 | 60.658   |
| hsa04510 | Focal adhesion                                         | 455.123  |
| hsa04512 | ECM-receptor interaction                               | 14.104   |
| hsa04622 | RIG-I-like receptor signaling pathway                  | 0.000    |
| hsa04630 | Jak-STAT signaling pathway                             | 135.708  |
| hsa04960 | Aldosterone-regulated sodium reabsorption              | 0.000    |
| hsa04971 | Gastric acid secretion                                 | 2.988    |
| hsa05222 | Small cell lung cancer                                 | 725.022  |
| hsa05412 | Arrhythmogenic right ventricular cardiomyopathy (ARVC) | 0.000    |

| Avg BEST Score of PI3K |         |
|------------------------|---------|
| <b>TimeTP</b>          | 674.109 |
| <b>DEAP</b>            | 000.000 |
| <b>SPIA</b>            | 267.412 |
| <b>TRAP</b>            | 271.771 |
| <b>TimeClip</b>        | 453.296 |

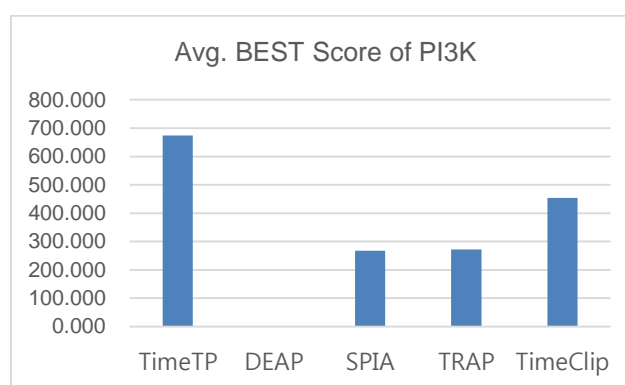

**Supplementary Table 4.** Pathways detected by TimeTP and other pathway analysis tools and their relevance to PI3K. Relevance to PI3K is evaluated using a state of the art context-aware literature search tool, BEST (<http://best.korea.ac.kr/>).
