# Supplementary material for: Influence maximization in time bounded network identifies transcription factors regulating perturbed pathways
Source: PubMed Central journal article supplement — Bioinformatics. 2016 Jun 11;32(12):i128–36. doi: 10.1093/bioinformatics/btw275 (PMC4908359; doi:10.1093/bioinformatics/btw275), 2016-06-11
Supplement: supp_btw275_Kim.89.sup.tab.1.pdf [file supp_btw275_Kim.89.sup.tab.1.pdf]

| Pathway  | Pathway name                                           | DEAP  | TimeClip | SPIA  | TRAP  |       |
|----------|--------------------------------------------------------|-------|----------|-------|-------|-------|
|          |                                                        |       |          |       | pORA  | pPERT |
| hsa00140 | Steroid hormone biosynthesis                           | -     | 0.005    | -     | -     | -     |
| hsa00330 | Arginine and proline metabolism                        | -     | 0.032    | -     | -     | -     |
| hsa00450 | Selenocompound metabolism                              | -     | 0.016    | -     | -     | -     |
| hsa00830 | Retinol metabolism                                     | -     | 0.044    | -     | -     | -     |
| hsa04010 | MAPK signaling pathway                                 | -     | -        | -     | 0.000 | 0.035 |
| hsa04014 | Ras signaling pathway                                  | -     | 0.047    | -     | -     | -     |
| hsa04015 | Rap1 signaling pathway                                 | -     | 0.006    | -     | 0.000 | 0.043 |
| hsa04022 | cGMP-PKG signaling pathway                             | -     | -        | -     | 0.000 | 0.000 |
| hsa04060 | Cytokine-cytokine receptor interaction                 | -     | -        | -     | 0.000 | 0.000 |
| hsa04062 | Chemokine signaling pathway                            | -     | -        | -     | 0.000 | 0.046 |
| hsa04080 | Neuroactive ligand-receptor interaction                | -     | 0.028    | -     | 0.000 | 0.005 |
| hsa04110 | Cell cycle                                             | -     | 0.032    | -     | -     | -     |
| hsa04115 | p53 signaling pathway                                  | -     | 0.036    | -     | -     | -     |
| hsa04270 | Vascular smooth muscle contraction                     | -     | -        | -     | 0.000 | 0.001 |
| hsa04340 | Hedgehog signaling pathway                             | -     | 0.039    | -     | -     | -     |
| hsa04350 | TGF-beta signaling pathway                             | -     | -        | 0.002 | -     | -     |
| hsa04370 | VEGF signaling pathway                                 | -     | 0.010    | -     | -     | -     |
| hsa04512 | ECM-receptor interaction                               | -     | 0.030    | 0.002 | 0.000 | 0.001 |
| hsa04540 | Gap junction                                           | -     | -        | -     | 0.006 | 0.013 |
| hsa04611 | Platelet activation                                    | -     | -        | -     | 0.000 | 0.003 |
| hsa04622 | RIG-I-like receptor signaling pathway                  | -     | 0.015    | -     | -     | -     |
| hsa04630 | Jak-STAT signaling pathway                             | -     | 0.021    | 0.002 | -     | -     |
| hsa04668 | TNF signaling pathway                                  | -     | -        | -     | 0.030 | 0.000 |
| hsa04720 | Long-term potentiation                                 | -     | -        | -     | 0.000 | 0.028 |
| hsa04721 | Synaptic vesicle cycle                                 | 0.000 | -        | -     | -     | -     |
| hsa04723 | Retrograde endocannabinoid signaling                   | -     | -        | -     | 0.000 | 0.000 |
| hsa04724 | Glutamatergic synapse                                  | -     | -        | -     | 0.000 | 0.047 |
| hsa04730 | Long-term depression                                   | -     | -        | -     | 0.001 | 0.002 |
| hsa04740 | Olfactory transduction                                 | -     | -        | -     | 0.000 | 0.000 |
| hsa04744 | Phototransduction                                      | -     | -        | -     | 0.000 | 0.048 |
| hsa04912 | GnRH signaling pathway                                 | -     | -        | -     | 0.000 | 0.035 |
| hsa04960 | Aldosterone-regulated sodium reabsorption              | -     | 0.048    | -     | -     | -     |
| hsa04970 | Salivary secretion                                     | -     | -        | -     | 0.000 | 0.001 |
| hsa04971 | Gastric acid secretion                                 | -     | 0.019    | -     | 0.000 | 0.000 |
| hsa05010 | Alzheimer's disease                                    | -     | -        | -     | 0.000 | 0.002 |
| hsa05133 | Pertussis                                              | -     | -        | -     | 0.000 | 0.010 |
| hsa05134 | Legionellosis                                          | -     | -        | -     | 0.000 | 0.001 |
| hsa05140 | Leishmaniasis                                          | -     | -        | -     | 0.000 | 0.000 |
| hsa05143 | African trypanosomiasis                                | -     | -        | -     | 0.000 | 0.034 |
| hsa05144 | Malaria                                                | -     | -        | -     | 0.000 | 0.000 |
| hsa05146 | Amoebiasis                                             | -     | -        | -     | 0.000 | 0.001 |
| hsa05215 | Prostate cancer                                        | -     | -        | -     | 0.000 | 0.029 |
| hsa05222 | Small cell lung cancer                                 | -     | 0.046    | 0.002 | -     | -     |
| hsa05321 | Inflammatory bowel disease (IBD)                       | -     | -        | -     | 0.000 | 0.019 |
| hsa05323 | Rheumatoid arthritis                                   | -     | -        | -     | 0.000 | 0.006 |
| hsa05412 | Arrhythmogenic right ventricular cardiomyopathy (ARVC) | -     | 0.047    | -     | -     | -     |

**Supplementary Table 1.** Pathways detected by other representative tools and not detected by TimeTP. Pathways with p-value over 0.05 are denoted as '-'.
