# Supplementary material for: Influence maximization in time bounded network identifies transcription factors regulating perturbed pathways
Source: PubMed Central journal article supplement — Bioinformatics. 2016 Jun 11;32(12):i128–36. doi: 10.1093/bioinformatics/btw275 (PMC4908359; doi:10.1093/bioinformatics/btw275), 2016-06-11
Supplement: supp_btw275_Kim.89.sup.tab.4.pdf [file supp_btw275_Kim.89.sup.tab.4.pdf]

| Tool            | pathwayID | pathwayName                             | Avg. BEST Score of PI3K |
|-----------------|-----------|-----------------------------------------|-------------------------|
| <b>TimeTP</b>   | hsa04012  | ErbB signaling pathway                  | 34.417                  |
|                 | hsa04068  | FoxO signaling pathway                  | 39.465                  |
|                 | hsa04114  | Oocyte meiosis                          | 17.719                  |
|                 | hsa04151  | PI3K-Akt signaling pathway              | 5888.045                |
|                 | hsa04310  | Wnt signaling pathway                   | 203.205                 |
|                 | hsa04510  | Focal adhesion                          | 455.123                 |
|                 | hsa04520  | Adherens junction                       | 81.145                  |
|                 | hsa04666  | Fc gamma R-mediated phagocytosis        | 0.000                   |
|                 | hsa04810  | Regulation of actin cytoskeleton        | 21.974                  |
|                 | hsa04921  | Oxytocin signaling pathway              | 0.000                   |
| <b>DEAP</b>     | hsa04721  | Synaptic vesicle cycle                  | 0.000                   |
| <b>SPIA</b>     | hsa04350  | TGF-beta signaling pathway              | 7.100                   |
|                 | hsa04510  | Focal adhesion                          | 455.123                 |
|                 | hsa04512  | ECM-receptor interaction                | 14.104                  |
|                 | hsa04630  | Jak-STAT signaling pathway              | 135.708                 |
|                 | hsa05222  | Small cell lung cancer                  | 725.022                 |
| <b>TRAP</b>     | hsa04010  | MAPK signaling pathway                  | 550.741                 |
|                 | hsa04015  | Rap1 signaling pathway                  | 4.825                   |
|                 | hsa04022  | cGMP-PKG signaling pathway              | 8.847                   |
|                 | hsa04060  | Cytokine-cytokine receptor interaction  | 12.712                  |
|                 | hsa04062  | Chemokine signaling pathway             | 11.871                  |
|                 | hsa04080  | Neuroactive ligand-receptor interaction | 3.869                   |
|                 | hsa04151  | PI3K-Akt signaling pathway              | 5888.045                |
|                 | hsa04270  | Vascular smooth muscle contraction      | 2.536                   |
|                 | hsa04510  | Focal adhesion                          | 455.123                 |
|                 | hsa04512  | ECM-receptor interaction                | 14.104                  |
|                 | hsa04540  | Gap junction                            | 69.789                  |
|                 | hsa04611  | Platelet activation                     | 143.910                 |
|                 | hsa04668  | TNF signaling pathway                   | 1.459                   |
|                 | hsa04720  | Long-term potentiation                  | 74.123                  |
|                 | hsa04723  | Retrograde endocannabinoid signaling    | 0.000                   |
|                 | hsa04724  | Glutamatergic synapse                   | 5.982                   |
|                 | hsa04730  | Long-term depression                    | 25.106                  |
|                 | hsa04740  | Olfactory transduction                  | 3.396                   |
|                 | hsa04744  | Phototransduction                       | 2.279                   |
|                 | hsa04912  | GnRH signaling pathway                  | 2.167                   |
|                 | hsa04921  | Oxytocin signaling pathway              | 0.000                   |
|                 | hsa04970  | Salivary secretion                      | 0.190                   |
|                 | hsa04971  | Gastric acid secretion                  | 2.988                   |
|                 | hsa05010  | Alzheimer's disease                     | 287.818                 |
|                 | hsa05133  | Pertussis                               | 115.092                 |
|                 | hsa05134  | Legionellosis                           | 0.000                   |
|                 | hsa05140  | Leishmaniasis                           | 17.211                  |
|                 | hsa05143  | African trypanosomiasis                 | 0.000                   |
|                 | hsa05144  | Malaria                                 | 20.215                  |
|                 | hsa05146  | Amoebiasis                              | 0.577                   |
|                 | hsa05215  | Prostate cancer                         | 967.044                 |
|                 | hsa05321  | Inflammatory bowel disease (IBD)        | 93.237                  |
|                 | hsa05323  | Rheumatoid arthritis                    | 183.177                 |
| <b>TimeClip</b> | hsa00140  | Steroid hormone biosynthesis            | 3.001                   |
|                 | hsa00330  | Arginine and proline metabolism         | 0.000                   |
|                 | hsa00450  | Selenocompound metabolism               | 0.000                   |
|                 | hsa00830  | Retinol metabolism                      | 0.000                   |
|                 | hsa04014  | Ras signaling pathway                   | 121.478                 |
|                 | hsa04015  | Rap1 signaling pathway                  | 4.825                   |
|                 | hsa04080  | Neuroactive ligand-receptor interaction | 3.869                   |

|          |                                                        |          |
|----------|--------------------------------------------------------|----------|
| hsa04110 | Cell cycle                                             | 1795.028 |
| hsa04115 | p53 signaling pathway                                  | 54.785   |
| hsa04151 | PI3K-Akt signaling pathway                             | 5888.045 |
| hsa04310 | Wnt signaling pathway                                  | 203.205  |
| hsa04340 | Hedgehog signaling pathway                             | 51.371   |
| hsa04370 | VEGF signaling pathway                                 | 60.658   |
| hsa04510 | Focal adhesion                                         | 455.123  |
| hsa04512 | ECM-receptor interaction                               | 14.104   |
| hsa04622 | RIG-I-like receptor signaling pathway                  | 0.000    |
| hsa04630 | Jak-STAT signaling pathway                             | 135.708  |
| hsa04960 | Aldosterone-regulated sodium reabsorption              | 0.000    |
| hsa04971 | Gastric acid secretion                                 | 2.988    |
| hsa05222 | Small cell lung cancer                                 | 725.022  |
| hsa05412 | Arrhythmogenic right ventricular cardiomyopathy (ARVC) | 0.000    |

| Avg BEST Score of PI3K |         |
|------------------------|---------|
| <b>TimeTP</b>          | 674.109 |
| <b>DEAP</b>            | 000.000 |
| <b>SPIA</b>            | 267.412 |
| <b>TRAP</b>            | 271.771 |
| <b>TimeClip</b>        | 453.296 |

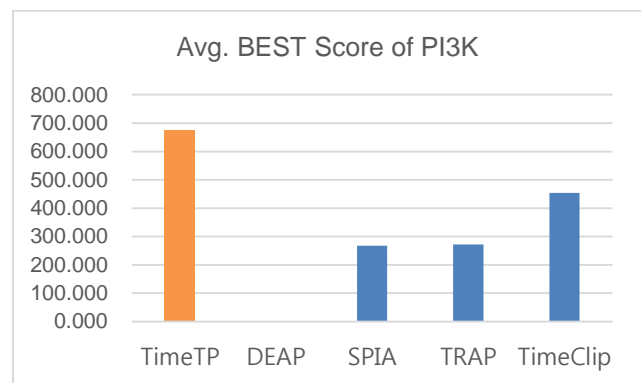

**Supplementary Table 4.** Pathways detected by TimeTP and other pathway analysis tools and their relevance to PI3K. Relevance to PI3K is evaluated using a state of the art context-aware literature search tool, BEST (<http://best.korea.ac.kr/>).
